# Supplementary material for: Analysis of Fluid Balance and Urine Values in Elite Soccer Players: Impact of Different Environments, Playing Positions, Sexes, and Competitive Levels
Source: MDPI journal article supplement (doi:10.3390/nu16060903), 2024-03-21
Supplement: s1 [file s1]

Table S1. Hydration values and fluid balance of the sample as a function of playing position.

RM sample

|   |                  | Goalkeeper<br>(n=4) | Defender<br>(n=7)         | Midfielder<br>(n=8)       | Forward<br>(n=8)          | Total<br>(n=27)          |
|---|------------------|---------------------|---------------------------|---------------------------|---------------------------|--------------------------|
| W | Weight loss:     |                     |                           |                           |                           |                          |
|   | kg               | 0.52 (0.46)         | 0.56 (0.51)               | 1.07 (0.68) <sup>†</sup>  | 0.43 (0.50)               | 0.67 (0.59)*             |
|   | %                | 0.69 (0.59)         | 0.79 (0.77)               | 1.56 (0.90) <sup>†</sup>  | 0.58 (0.71)               | 0.94 (0.84)              |
|   | Fluid intake (l) | 1.18 (0.38)         | 1.51 (0.83)               | 1.96 (0.82) <sup>†</sup>  | 1.68 (0.52) <sup>†</sup>  | 1.64 (0.70)*             |
|   | Urine output (l) | 0.14 (0.07)         | 0.21 (0.15)               | 0.24 (0.16)               | 0.21 (0.13)               | 0.20 (0.13) <sup>†</sup> |
|   | SR:              |                     |                           |                           |                           |                          |
|   | l/h              | 0.78 (0.23)         | 0.94 (0.28) <sup>†</sup>  | 1.39 (0.55) <sup>†</sup>  | 0.96 (0.30) <sup>†</sup>  | 1.05 (0.43)*             |
|   | ml/min           | 13.02 (3.83)        | 15.58 (4.71) <sup>†</sup> | 23.24 (9.21) <sup>†</sup> | 15.94 (4.95) <sup>†</sup> | 17.58 (7.16)*            |
|   | USG              | 1.02 (0.01)         | 1.02 (0.01)               | 1.02 (0.01)               | 1.02 (0.01)               | 1.02 (0.01)*             |
| C | Weight loss:     |                     |                           |                           |                           |                          |
|   | kg               | 0.34 (0.25)         | 0.52 (0.44)               | 0.31 (0.34)               | 0.22 (0.40)               | 0.34 (0.37)              |
|   | %                | 0.48 (0.36)         | 0.71 (0.56)               | 0.45 (0.45)               | 0.32 (0.61)               | 0.48 (0.52)              |
|   | Fluid intake (l) | 0.90 (0.24)         | 0.97 (0.48)               | 0.84 (0.40)               | 1.06 (0.38)               | 0.95 (0.38)              |
|   | Urine output (l) | 0.11 (0.04)         | 0.16 (0.12)               | 0.11 (0.06)               | 0.18 (0.08)               | 0.11 (0.08)              |
|   | SR:              |                     |                           |                           |                           |                          |
|   | l/h              | 0.57 (0.22)         | 0.67 (0.12)               | 0.52 (0.16)               | 0.55 (0.07)               | 0.57 (0.14)              |
|   | ml/min           | 9.44 (3.72)         | 11.10 (1.93)              | 8.66 (2.61)               | 9.19 (1.18)               | 9.56 (9.67)              |
|   | USG              | 1.02 (0.01)         | 1.02 (0.01)               | 1.02 (0.01)               | 1.03 (0.01)               | 1.02 (0.01)              |

n-RM sample

|              |  | Goalkeeper |         |         | Defender |         |          | Midfielder |          |          | Forward  |         |          | Total    |          |          |
|--------------|--|------------|---------|---------|----------|---------|----------|------------|----------|----------|----------|---------|----------|----------|----------|----------|
|              |  | W (n=5)    | C (n=3) | T (n=8) | W (n=24) | C (n=8) | T (n=32) | W (n=19)   | C (n=12) | T (n=31) | W (n=14) | C (n=2) | T (n=16) | W (n=62) | C (n=25) | T (n=87) |
| Weight loss: |  |            |         |         |          |         |          |            |          |          |          |         |          |          |          |          |
| kg           |  | 0.50       | 0.33    | 0.44    | 0.67     | 0.34    | 0.59     | 0.72       | 0.39     | 0.59     | 0.48     | 0.50    | 0.48     | 0.63     | 0.37     | 0.55     |
|              |  | (0.40)     | (1.28)  | (0.75)  | (0.59)   | (0.24)  | (0.54)   | (0.63)     | (0.38)   | (0.56)   | (0.54)   | (0.07)  | (0.50)   | (0.57)   | (0.47)   | (0.56)   |

|                     |                 |                |                 |                 |                |                              |                 |                |                              |                 |                 |                 |                 |                |                              |
|---------------------|-----------------|----------------|-----------------|-----------------|----------------|------------------------------|-----------------|----------------|------------------------------|-----------------|-----------------|-----------------|-----------------|----------------|------------------------------|
| %                   | 0.69<br>(0.51)  | 0.41<br>(1.54) | 0.58<br>(0.91)  | 0.98<br>(0.79)  | 0.47<br>(0.35) | 0.85<br>(0.73)               | 1.06<br>(0.89)  | 0.55<br>(0.56) | 0.86<br>(0.81)               | 0.66<br>(0.73)  | 0.84<br>(0.15)  | 0.68<br>(0.68)  | 0.91<br>(0.79)  | 0.53<br>(0.62) | 0.80<br>(0.76) <sup>†</sup>  |
| Fluid intake<br>(l) | 1.25<br>(0.36)  | 1.36<br>(0.92) | 1.29<br>(0.57)  | 1.64<br>(0.67)  | 0.86<br>(0.30) | 1.44<br>(0.69) <sup>†</sup>  | 1.89<br>(0.73)  | 0.92<br>(0.45) | 1.51<br>(0.79) <sup>†</sup>  | 1.59<br>(0.52)  | 0.90<br>(0.85)  | 1.50<br>(0.58)  | 1.67<br>(0.65)  | 0.95<br>(0.50) | 1.46<br>(0.69) <sup>†</sup>  |
| Urine output<br>(l) | 0.14<br>(0.06)  | 0.15<br>(0.11) | 0.14<br>(0.07)  | 0.19<br>(0.13)  | 0.20<br>(0.14) | 0.19<br>(0.13)               | 0.18<br>(0.13)  | 0.15<br>(0.07) | 0.17<br>(0.11)               | 0.18<br>(0.11)  | 0.05<br>(0.01)  | 0.16<br>(0.11)  | 0.18<br>(0.12)  | 1.70<br>(0.10) | 0.17<br>(0.12)               |
| SR:                 |                 |                |                 |                 |                |                              |                 |                |                              |                 |                 |                 |                 |                |                              |
| l/h                 | 0.80<br>(0.20)  | 0.77<br>(0.24) | 0.79<br>(0.20)  | 1.06<br>(0.45)  | 0.50<br>(0.15) | 0.92<br>(0.46) <sup>†</sup>  | 1.21<br>(0.46)  | 0.58<br>(0.13) | 0.97<br>(0.48) <sup>†</sup>  | 0.95<br>(0.33)  | 0.68<br>(0.39)  | 0.91<br>(0.34)  | 1.06<br>(0.43)  | 0.58<br>(0.18) | 0.92<br>(0.43) <sup>†</sup>  |
| ml/min              | 13.37<br>(3.41) | 12.89<br>(4.0) | 13.19<br>(3.35) | 17.63<br>(7.51) | 8.31<br>(2.53) | 15.30<br>(7.75) <sup>†</sup> | 20.20<br>(7.74) | 9.63<br>(2.1)  | 16.11<br>(8.06) <sup>†</sup> | 15.76<br>(5.50) | 11.29<br>(6.42) | 15.20<br>(5.59) | 17.65<br>(7.10) | 9.73<br>(3.00) | 15.38<br>(7.16) <sup>†</sup> |
| USG                 | 1.02<br>(0.01)  | 1.03<br>(0.01) | 1.02<br>(0.00)  | 1.02<br>(0.01)  | 1.03<br>(0.01) | 1.02<br>(0.01)               | 1.02<br>(0.01)  | 1.02<br>(0.01) | 1.02<br>(0.01)               | 1.02<br>(0.01)  | 1.03<br>(0.00)  | 1.02<br>(0.01)  | 1.02<br>(0.01)  | 1.03<br>(0.01) | 1.02<br>(0.01)               |

W: Summer measurement; C: Winter measurement; SR: Sweat rate; T: Total; USG: Urine specific gravity. Variables are expressed as mean (SD). \*p<0.05 playing position. †p<0.05 warm vs cool.

Table S2. Hydration values and fluid balance of the sample as a function of playing position.

**RM sample. (n (%))**

|      |   | Goalkeeper<br>(n=4) |          | Defender<br>(n=7) |          | Midfielder<br>(n=8) |          | Forward<br>(n=8) |          | Total<br>(n=27) |           |
|------|---|---------------------|----------|-------------------|----------|---------------------|----------|------------------|----------|-----------------|-----------|
|      |   | CO                  | USG      | CO                | USG      | CO                  | USG      | CO               | USG      | CO              | USG       |
| H:   | W | 0 (0.0)             | 1 (25.0) | 1 (14.3)          | 2 (28.6) | 1 (12.5)            | 3 (37.5) | 1 (12.5)         | 2 (25.0) | 3 (11.1)        | 8 (29.6)  |
|      | C | 0 (0.0)             | 2 (50.0) | 0 (0.0)           | 2 (28.6) | 0 (0.0)             | 2 (25.0) | 0 (0.0)          | 1 (12.5) | 0 (0.0)         | 7 (25.6)  |
| DH:  | W | 3 (75.0)            | 0 (0.0)  | 4 (57.1)          | 2 (28.6) | 6 (75.0)            | 3 (37.5) | 5 (62.5)         | 2 (25.0) | 18 (66.7)       | 7 (25.9)  |
|      | C | 4 (100.0)           | 0 (0.0)  | 7 (100.0)         | 0 (0.0)  | 8 (100.0)           | 2 (25.0) | 8 (100.0)        | 3 (37.5) | 17 (100.0)      | 5 (18.5)  |
| SDH: | W | 1 (25.0)            | 3 (75.0) | 2 (28.6)          | 3 (42.9) | 1 (12.5)            | 2 (25.0) | 2 (25.0)         | 4 (50.0) | 6 (22.2)        | 12 (44.4) |
|      | C | 0 (0.0)             | 2 (50.0) | 0 (0.0)           | 5 (71.4) | 0 (0.0)             | 4 (50.0) | 0 (0.0)          | 4 (50.0) | 0 (0.0)         | 15 (55.6) |

**n-RM sample. (n (%))**

|  |  | Goalkeeper |     | Defender |     | Midfielder |     | Forward |     | Total |     |
|--|--|------------|-----|----------|-----|------------|-----|---------|-----|-------|-----|
|  |  | CO         | USG | CO       | USG | CO         | USG | CO      | USG | CO    | USG |

|      |   |           |          |           |           |            |          |          |           |           |           |
|------|---|-----------|----------|-----------|-----------|------------|----------|----------|-----------|-----------|-----------|
| H:   | W | 0 (0.0)   | 2 (40.0) | 4 (16.7)  | 6 (25.0)  | 2 (10.5)   | 6 (31.6) | 1 (7.1)  | 2 (14.3)  | 7 (11.3)  | 16 (25.8) |
|      | C | 0 (0.0)   | 1 (33.3) | 0 (0.0)   | 3 (37.5)  | 0 (0.0)    | 2 (16.7) | 0 (0.0)  | 0 (0.0)   | 0 (0.0)   | 6 (24.0)  |
| DH:  | W | 4 (80.0)  | 0 (0.0)  | 17 (70.8) | 8 (33.3)  | 16 (84.2)  | 7 (36.8) | 9 (64.3) | 6 (42.8)  | 46 (74.2) | 21 (33.9) |
|      | C | 3 (100.0) | 0 (0.0)  | 7 (87.5)  | 1 (12.5)  | 12 (100.0) | 4 (33.3) | 1 (50.0) | 0 (0.0)   | 3 (92.0)  | 5 (20.0)  |
| SDH: | W | 1 (20.0)  | 3 (60.0) | 3 (12.5)  | 10 (41.7) | 1 (5.3)    | 6 (31.6) | 4 (28.6) | 6 (42.8)  | 9 (14.5)  | 25 (40.3) |
|      | C | 0 (0.0)   | 2 (66.7) | 1 (12.5)  | 4 (50.0)  | 0 (0.0)    | 6 (50.0) | 1 (50.0) | 2 (100.0) | 2 (8.0)   | 14 (56.0) |

W: Summer measurement; C: Winter measurement; CO: Urine colour; DH: Dehydrated; H: Hydrated; SDH: Seriously dehydrated; USG: Urine specific gravity. Variables are expressed as n (%). \*p<0.05 hydration status vs playing position.

**Sweating rate player position of the sample with repeated measurements (l/h)**

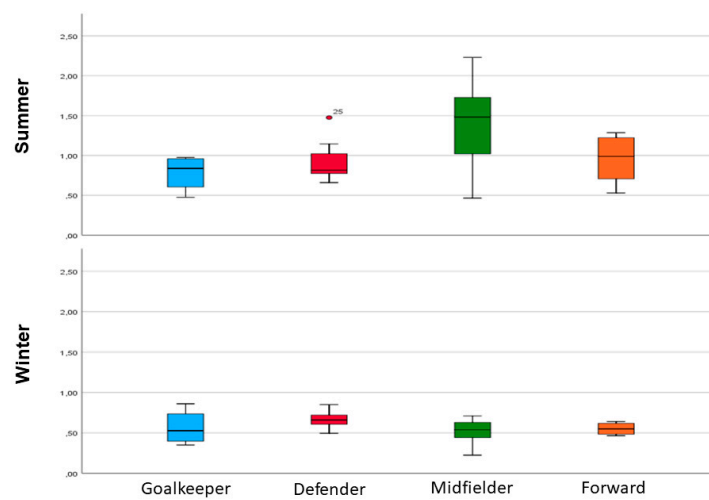

Figure S1. Sweating rate by player position of the sample with repeated measurements.

**Sweating rate player position of the sample with no repeated measurements (l/h)**

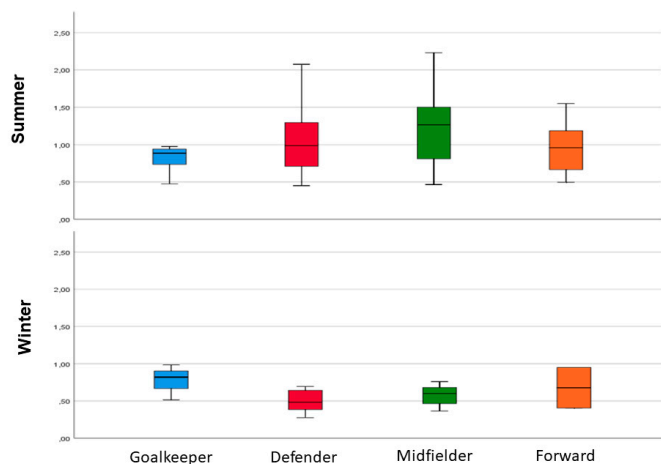

Figure S2. Sweating rate by player position of the sample with non-repeated measurements.

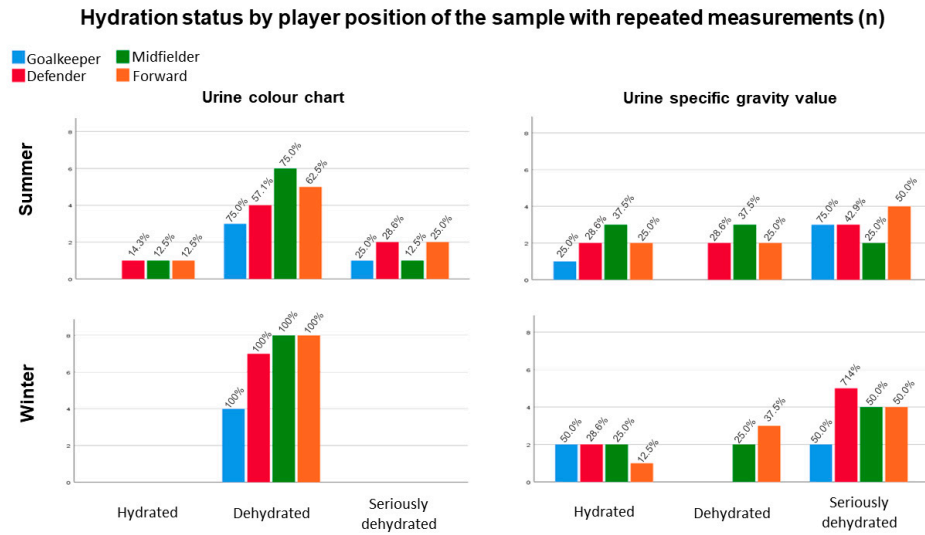

Figure S3. Hydration status by player position of the sample with repeated measurements

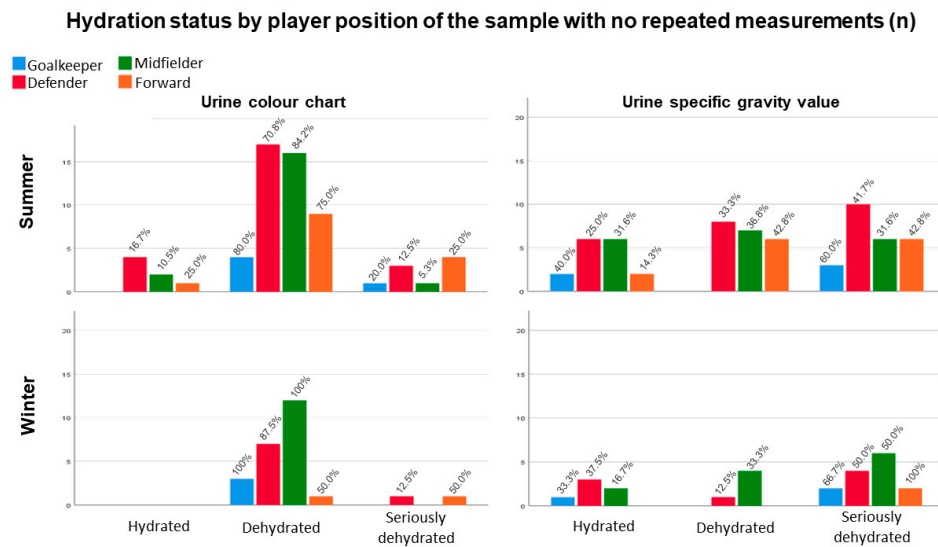

Figure S4. Hydration status by player position of the sample with non-repeated measurements.
